# Supplementary material
Source: publisher site journal article supplement (https://www.dovepress.com/article/326686)
Supplement: Supplementary file 1 [file get_supplementary_file.php]

**Online-Only Supplemental Material:**

**Appendix A** Full search strategy

**Appendix B** Newcastle-Ottawa Scale

**Appendix A. Full search strategy (June 21, 2020)**

**PubMed**

| # | Query | Results |
| --- | --- | --- |
| #14 | #10 AND #13 | **5.729** |
| #13 | #11 OR #12 | **2.085.084** |
| #12 | "Motor Activity"[Mesh:NoExp] OR "Exercise"[Mesh] OR "Sports"[Mesh] OR "Physical Exertion"[Mesh] OR "Early Ambulation"[Mesh] OR "Exercise Therapy"[Mesh] OR "Exercise Movement Techniques"[Mesh] OR “Locomotion”[Mesh] OR “Motor Activit*”[tiab] OR “Physical Activit*”[tiab] OR “Locomotor Activit*”[tiab] OR “Exercis*”[tiab] OR “Physical Exercis*”[tiab] OR “Isometric Exercis*”[tiab] OR “Aerobic Exercis*”[tiab] OR “training”[tiab] OR “stretching”[tiab] OR “Physical Condition*”[tiab] OR “Physical fitness”[tiab] OR “Physical endurance”[tiab] OR “movement therap*”[tiab] OR “fitness training”[tiab] OR “Plyometric”[tiab] OR “Stretch-Shortening”[tiab] OR “Weight-Lifting”[tiab] OR “Weight-Bearing”[tiab] OR “running”[tiab] OR “jogging”[tiab] OR “walk*”[tiab] OR “bicycle”[tiab] OR “cycle”[tiab] OR “bicycling”[tiab] OR “cycling”[tiab] OR “rowing”[tiab] OR “swim*”[tiab] OR “ambulation”[tiab] OR “mobil*”[tiab] OR “pilates”[tiab] OR “yoga”[tiab] | **2.061.636** |
| #11 | "Sedentary Behavior"[Mesh] OR “sedent*”[tiab] OR “sitting”[tiab] OR “physical inactivit*”[tiab] | **61.174** |
| #10 | #3 OR #5 OR #9 | **10.790** |
| #9 | #1 AND #8 | **4.320** |
| #8 | #6 AND #7 | **19.226** |
| #7 | "Monitoring, Physiologic"[Mesh:NoExp] OR "Monitoring, Ambulatory"[Mesh:NoExp] OR “monitoring”[tiab] | **528.186** |
| #6 | "Heart Rate"[Mesh:NoExp] OR “cardiac rate*”[tiab] OR “heart rate*”[tiab] OR “pulse rate*”[tiab] OR “cardiac frequency”[tiab] OR “heart frequency”[tiab] | **246.877** |
| #5 | #1 AND #4 | **868** |
| #4 | “pedomet*”[tiab] | **2.755** |
| #3 | #1 AND #2 | **5.977** |
| #2 | "Accelerometry"[Mesh] OR “Acceleromet*”[tiab] OR “actigra*”[tiab] | **23.701** |
| #1 | ("Aged"[Mesh] OR "Aged, 80 and over"[Mesh] OR "Frail Elderly"[Mesh] OR "Geriatrics"[Mesh] OR "Geriatric Psychiatry"[Mesh] OR "Geriatric Nursing"[Mesh] OR "Geriatric Dentistry"[Mesh] OR "Dental Care for Aged"[Mesh] OR "Health Services for the Aged"[Mesh]) OR (“elder*”[tw] OR “eldest”[tw] OR “frail*”[tw] OR “geriatri*”[tw] OR “old age*”[tw] OR “oldest old*”[tw] OR “senior*”[tw] OR “senium”[tw] OR “very old*”[tw] OR “septuagenarian*”[tw] OR “octagenarian*”[tw] OR “octogenarian*”[tw] OR “nonagenarian*”[tw] OR “centarian*”[tw] OR “centenarian*”[tw] OR “supercentenarian*”[tw] OR “older people”[tw] OR “older subject*”[tw] OR “older patient*”[tw] OR “older age*”[tw] OR “older adult*”[tw] OR “older man”[tw] OR “older men”[tw] OR “older male”[tw] OR “older woman”[tw] OR “older women”[tw] OR “older female”[tw] OR “older population*”[tw] OR “older person*”[tw]) | **3.334.172** |

**Embase.com**

| # | Query | Results |
| --- | --- | --- |
| #15 | #10 AND #14 | **6.801** |
| #14 | #11 OR #12 OR #13 | **2.695.910** |
| #13 | ((motor NEXT/1 activit*):ab,ti,kw) OR ((physical NEXT/1 activit*):ab,ti,kw) OR locomot*:ab,ti,kw OR exercis*:ab,ti,kw OR training:ab,ti,kw OR stretching:ab,ti,kw OR ((physical NEXT/1 condition*):ab,ti,kw) OR 'physical fitness':ab,ti,kw OR 'physical endurance':ab,ti,kw OR ((movement NEXT/1 therap*):ab,ti,kw) OR plyometric:ab,ti,kw OR 'stretch shortening':ab,ti,kw OR 'weight lifting':ab,ti,kw OR 'weight bearing':ab,ti,kw OR running:ab,ti,kw OR jogging:ab,ti,kw OR walk*:ab,ti,kw OR bicycle:ab,ti,kw OR cycle:ab,ti,kw OR bicycling:ab,ti,kw OR cycling:ab,ti,kw OR rowing:ab,ti,kw OR swim*:ab,ti,kw OR ambulation:ab,ti,kw OR mobil*:ab,ti,kw OR pilates:ab,ti,kw OR yoga:ab,ti,kw | **2.314.193** |
| #12 | 'motor activity'/de OR 'exercise'/exp OR 'sport'/exp OR 'mobilization'/exp OR 'kinesiotherapy'/exp OR 'physical activity'/exp OR 'fitness'/exp OR 'locomotion'/exp | **951.571** |
| #11 | 'sedentary lifestyle'/exp OR 'sitting'/exp OR 'physical inactivity'/exp OR sedent*:ab,ti,kw OR sitting:ab,ti,kw OR ((physical NEXT/1 inactivit*):ab,ti,kw) | **91.488** |
| #10 | #3 OR #5 OR #9 | **12.541** |
| #9 | #1 AND #8 | **4.407** |
| #8 | #6 AND #7 | **25.596** |
| #7 | 'physiologic monitoring'/exp OR 'ambulatory monitoring'/exp OR monitoring:ab,ti,kw | **709.204** |
| #6 | 'heart rate'/de OR 'heart rate variability'/de OR 'resting heart rate'/de OR 'cardiac rate':ab,ti,kw OR 'heart rate':ab,ti,kw OR 'pulse rate':ab,ti,kw OR 'cardiac frequency':ab,ti,kw OR 'heart frequency':ab,ti,kw | **318.213** |
| #5 | #1 AND #4 | **1.097** |
| #4 | 'pedometer'/exp OR 'pedometry'/exp OR pedomet*:ab,ti,kw | **4.154** |
| #3 | #1 AND #2 | **7.844** |
| #2 | 'accelerometry'/exp OR 'accelerometer'/exp OR 'actimetry'/exp OR 'actigraph'/exp OR acceleromet*:ab,ti OR actigra*:ab,ti | **36.929** |
| #1 | 'aged'/exp OR 'geriatrics'/exp OR 'elderly care'/exp OR elder*:de,ab,ti OR eldest:de,ab,ti OR frail*:de,ab,ti OR geriatri*:de,ab,ti OR ((old NEXT/1 age*):de,ab,ti) OR ((oldest NEXT/1 old*):de,ab,ti) OR senior*:de,ab,ti OR senium:de,ab,ti OR ((very NEXT/1 old*):de,ab,ti) OR septuagenarian*:de,ab,ti OR octagenarian*:de,ab,ti OR octogenarian*:de,ab,ti OR nonagenarian*:de,ab,ti OR centarian*:de,ab,ti OR centenarian*:de,ab,ti OR supercentenarian*:de,ab,ti OR 'older people':de,ab,ti OR ((older NEXT/1 subject*):de,ab,ti) OR ((older NEXT/1 patient*):de,ab,ti) OR ((older NEXT/1 age*):de,ab,ti) OR ((older NEXT/1 adult*):de,ab,ti) OR 'older man':de,ab,ti OR 'older men':de,ab,ti OR 'older male':de,ab,ti OR 'older woman':de,ab,ti OR 'older women':de,ab,ti OR 'older female':de,ab,ti OR ((older NEXT/1 population*):de,ab,ti) OR ((older NEXT/1 person*):de,ab,ti) | **3.432.221** |

**The Cochrane Library (via Wiley)**

| # | Query | Results |
| --- | --- | --- |
| #14 | #10 and #13 | **920** |
| #13 | #11 or #12 | **238.188** |
| #12 | ((motor NEXT activit*) or (physical NEXT activit*) or locomot* or exercis* or training or stretching or (physical NEXT condition*) or (physical NEXT fitness) or (physical NEXT endurance) or (movement NEXT therap*) or plyometric or (stretch NEXT shortening) or (weight NEXT lifting) or (weight NEXT bearing) or running or jogging or walk* or bicycle or cycle or bicycling or cycling or rowing or swim* or ambulation or mobil* or pilates or yoga):ti,ab,kw | **233.754** |
| #11 | (Sedent* or sitting or (physical NEXT inactivit*)):ti,ab,kw | **14.465** |
| #10 | #3 or #5 or #9 | **1.334** |
| #9 | #1 and #8 | **406** |
| #8 | #6 and #7 | **6.983** |
| #7 | monitoring:ti,ab,kw | **59.019** |
| #6 | ((cardiac NEXT rate):ab,ti,kw or (heart NEXT rate):ab,ti,kw or (pulse NEXT rate):ab,ti,kw or (cardiac NEXT frequency):ab,ti,kw or (heart NEXT frequency)):ti,ab,kw | **59.143** |
| #5 | #1 and #4 | **247** |
| #4 | pedomet*:ti,ab,kw | **1.712** |
| #3 | #1 and #2 | **780** |
| #2 | (acceleromet* or actigra*):ti,ab,kw | **5.965** |
| #1 | (elder* or eldest or frail* or geriatri* or (old NEXT age*) or (oldest NEXT old*) or senior* or senium or (very NEXT old*) or septuagenarian* or octagenarian* or octogenarian* or nonagenarian* or centarian* or centenarian* or supercentenarian* or (older NEXT people) or (older NEXT subject*) or (older NEXT patient*) or (older NEXT age*) or (older NEXT adult*) or (older NEXT man) or (older NEXT men) or (older NEXT male) or (older NEXT woman) or (older NEXT women) or (older NEXT female) or (older NEXT population*) or (older NEXT person*)):ti,ab,kw | **76.361** |

**CINAHL (via EBSCO)**

| # | Query | Results |
| --- | --- | --- |
| S14 | S10 AND S13 | **2,995** |
| S13 | S11 OR S12 | **592,088** |
| S12 | ( (MH "Motor Activity") OR (MH "Exercise+") OR (MH "Sports+") OR (MH "Early Ambulation") OR (MH "Therapeutic Exercise+") OR (MH "Locomotion+") ) OR TI ( (“motor activit*” OR “physical activit*” OR locomot* OR exercis* OR training OR stretching OR “physical condition*” OR “physical fitness” OR “physical endurance” OR “movement therap*” OR plyometric OR “stretch shortening” OR “weight lifting” OR “weight bearing” OR running OR jogging OR walk* OR bicycle OR cycle OR bicycling OR cycling OR rowing OR swim* OR ambulation OR mobil* OR pilates OR yoga) ) OR AB ( (“motor activit*” OR “physical activit*” OR locomot* OR exercis* OR training OR stretching OR “physical condition*” OR “physical fitness” OR “physical endurance” OR “movement therap*” OR plyometric OR “stretch shortening” OR “weight lifting” OR “weight bearing” OR running OR jogging OR walk* OR bicycle OR cycle OR bicycling OR cycling OR rowing OR swim* OR ambulation OR mobil* OR pilates OR yoga) ) | **582,203** |
| S11 | ( (MH "Life Style, Sedentary") OR (MH "Sitting") ) OR TI ( (sedent* OR sitting OR "physical inactivit*") ) OR AB ( (sedent* OR sitting OR "physical inactivit*") ) | **26,571** |
| S10 | S3 OR S5 OR S9 | **4,531** |
| S9 | S1 AND S8 | **1,003** |
| S8 | S6 AND S7 | **4,480** |
| S7 | (MH "Monitoring, Physiologic") OR TI monitoring OR AB monitoring | **111,399** |
| S6 | (MH "Heart Rate") OR TI ( ("cardiac rate" or "heart rate" or "pulse rate" or "cardiac frequency" or "heart frequency") ) OR AB ( ("cardiac rate" or "heart rate" or "pulse rate" or "cardiac frequency" or "heart frequency") ) | **47,141** |
| S5 | S1 AND S4 | **643** |
| S4 | (MH "Pedometers") OR TI pedomet* OR AB pedomet* | **2,279** |
| S3 | S1 AND S2 | **3,047** |
| S2 | ( (MH "Accelerometry+") OR (MH "Accelerometers") OR (MH "Actigraphy")) OR TI ( (acceleromet* or actigra*) ) OR AB ( (acceleromet* or actigra*) ) | **11,526** |
| S1 | MH "Aged+" OR MH "Aged, 80 and Over" OR MH "Frail Elderly" OR MH "Geriatrics" OR MH "Geriatric Psychiatry" OR MH "Gerontologic Nursing+" OR MH "Gerontologic Care" OR MH "Health Services for the Aged" OR TI (elder* OR eldest OR frail* OR geriatri* OR “old age*” OR “oldest old*” OR senior* OR senium OR “very old*” OR septuagenarian* OR octagenarian* OR octogenarian* OR nonagenarian* OR centarian* OR centenarian* OR supercentenarian* OR “older people” OR “older subject*” OR “older patient*” OR “older age*” OR “older adult*” OR “older man” OR “older men” OR “older male” OR “older woman” OR “older women” OR “older female” OR “older population*” OR “older person*”) OR AB (elder* OR eldest OR frail* OR geriatri* OR “old age*” OR “oldest old*” OR senior* OR senium OR “very old*” OR septuagenarian* OR octagenarian* OR octogenarian* OR nonagenarian* OR centarian* OR centenarian* OR supercentenarian* OR “older people” OR “older subject*” OR “older patient*” OR “older age*” OR “older adult*” OR “older man” OR “older men” OR “older male” OR “older woman” OR “older women” OR “older female” OR “older population*” OR “older person*”) | **919,735** |

**APA PsychINFO (via EBSCO)**

| # | Query | Results |
| --- | --- | --- |
| S17 | S13 AND S16 | **1,097** |
| S16 | S14 OR S15 | **527,097** |
| S15 | ( DE "Physical Activity" OR (DE "Exercise" OR DE "Aerobic Exercise" OR DE "Weightlifting" OR DE "Yoga") OR DE "Physical Fitness" OR (DE "Sports" OR DE "Baseball" OR DE "Basketball" OR DE "Football" OR DE "Judo" OR DE "Martial Arts" OR DE "Soccer" OR DE "Swimming" OR DE "Tennis" OR DE "Weightlifting") OR DE "Locomotion" AND #DE "Training" OR DE "Athletic Training" OR DE "Locomotion" ) OR TI ( (“motor activit*” OR “physical activit*” OR locomot* OR exercis* OR training OR stretching OR “physical condition*” OR “physical fitness” OR “physical endurance” OR “movement therap*” OR plyometric OR “stretch shortening” OR “weight lifting” OR “weight bearing” OR running OR jogging OR walk* OR bicycle OR cycle OR bicycling OR cycling OR rowing OR swim* OR ambulation OR mobil* OR pilates OR yoga) ) OR AB ( (“motor activit*” OR “physical activit*” OR locomot* OR exercis* OR training OR stretching OR “physical condition*” OR “physical fitness” OR “physical endurance” OR “movement therap*” OR plyometric OR “stretch shortening” OR “weight lifting” OR “weight bearing” OR running OR jogging OR walk* OR bicycle OR cycle OR bicycling OR cycling OR rowing OR swim* OR ambulation OR mobil* OR pilates OR yoga) ) | **522,065** |
| S14 | TI (sedent* OR sitting OR "physical inactivit*") OR AB (sedent* OR sitting OR "physical inactivit*") | **13,285** |
| S13 | S6 OR S8 OR S12 | **1,802** |
| S12 | S4 AND S11 | **131** |
| S11 | S9 AND S10 | **1,175** |
| S10 | DE "Monitoring" OR TI monitoring OR AB monitoring | **58,460** |
| S9 | DE "Heart Rate" OR TI ("cardiac rate" or "heart rate" or "pulse rate" or "cardiac frequency" or "heart frequency") OR AB ("cardiac rate" or "heart rate" or "pulse rate" or "cardiac frequency" or "heart frequency") | **28,295** |
| S8 | S4 AND S7 | **246** |
| S7 | TI pedomet* OR AB pedomet* | **860** |
| S6 | S4 AND S5 | **1,478** |
| S5 | (DE "Actigraphy") OR TI (acceleromet* OR actigra*) OR AB (acceleromet* OR actigra*) | **6,322** |
| S4 | S1 OR S2 OR S3 | **401,336** |
| S3 | TI (elder* OR eldest OR frail* OR geriatri* OR “old age*” OR “oldest old*” OR senior* OR senium OR “very old*” OR septuagenarian* OR octagenarian* OR octogenarian* OR nonagenarian* OR centarian* OR centenarian* OR supercentenarian* OR “older people” OR “older subject*” OR “older patient*” OR “older age*” OR “older adult*” OR “older man” OR “older men” OR “older male” OR “older woman” OR “older women” OR “older female” OR “older population*” OR “older person*”) OR AB (elder* OR eldest OR frail* OR geriatri* OR “old age*” OR “oldest old*” OR senior* OR senium OR “very old*” OR septuagenarian* OR octagenarian* OR octogenarian* OR nonagenarian* OR centarian* OR centenarian* OR supercentenarian* OR “older people” OR “older subject*” OR “older patient*” OR “older age*” OR “older adult*” OR “older man” OR “older men” OR “older male” OR “older woman” OR “older women” OR “older female” OR “older population*” OR “older person*”) | **174,582** |
| S2 | DE "Geriatrics" | **12,654** |
| S1 | Limiters - Age Groups: Aged (65 yrs & older) | **325,601** |

**SPORTDiscus (via EBSCO)**

| # | Query | Results |
| --- | --- | --- |
| S16 | S12 AND S15 | **544** |
| S15 | S13 OR S14 | **513,139** |
| S14 | DE "PHYSICAL activity" OR (DE "EXERCISE" OR DE "ABDOMINAL exercises" OR DE "AEROBIC exercises" OR DE "ANAEROBIC exercises" OR DE "AQUATIC exercises" OR DE "ARM exercises" OR DE "BACK exercises" OR DE "BREATHING exercises" OR DE "BREEMA" OR DE "BUTTOCKS exercises" OR DE "CALISTHENICS" OR DE "CHAIR exercises" OR DE "CHEST exercises" OR DE "CIRCUIT training" OR DE "COMPOUND exercises" OR DE "DO-in" OR DE "EXERCISE -- Immunological aspects" OR DE "EXERCISE adherence" OR DE "EXERCISE for children" OR DE "EXERCISE for girls" OR DE "EXERCISE for men" OR DE "EXERCISE for middle-aged persons" OR DE "EXERCISE for older people" OR DE "EXERCISE for people with disabilities" OR DE "EXERCISE for women" OR DE "EXERCISE for youth" OR DE "EXERCISE therapy" OR DE "EXERCISE video games" OR DE "FACIAL exercises" OR DE "FALUN gong exercises" OR DE "FOOT exercises" OR DE "GYMNASTICS" OR DE "HAND exercises" OR DE "HATHA yoga" OR DE "HIP exercises" OR DE "ISOKINETIC exercise" OR DE "ISOLATION exercises" OR DE "ISOMETRIC exercise" OR DE "ISOTONIC exercise" OR DE "KNEE exercises" OR DE "LEG exercises" OR DE "LIANGONG" OR DE "METABOLIC equivalent" OR DE "MULAN quan" OR DE "MUSCLE strength" OR DE "PILATES method" OR DE "PLYOMETRICS" OR DE "QI gong" OR DE "REDUCING exercises" OR DE "RUNNING" OR DE "RUNNING -- Social aspects" OR DE "SCHOOLS -- Exercises & recreations" OR DE "SEXUAL exercises" OR DE "SHOULDER exercises" OR DE "STRENGTH training" OR DE "STRESS management exercises" OR DE "TAI chi" OR DE "TREADMILL exercise" OR DE "WHEELCHAIR workouts" OR DE "YOGA") OR ( DE "PHYSICAL fitness" OR DE "PHYSICAL fitness for older people") OR (DE "SPORTS" OR DE "AERODYNAMICS in sports" OR DE "AERONAUTICAL sports" OR DE "AGE & sports" OR DE "AMATEUR sports" OR DE "ANIMAL sports" OR DE "ANTISEMITISM in sports" OR DE "AQUATIC sports" OR DE "BALL games" OR DE "BALLISTICS in sports" OR DE "BASEBALL" OR DE "BIOMECHANICS in sports" OR DE "COLLEGE sports" OR DE "COMMUNICATION in sports" OR DE "CONTACT sports" OR DE "CROSS-training Sports" OR DE "DISC golf" OR DE "DISCRIMINATION in sports" OR DE "DOG sports" OR DE "DOPING in sports" OR DE "ENDURANCE sports" OR DE "EXTREME sports" OR DE "FANTASY sports" OR DE "FASCISM & sports" OR DE "FEMINISM & sports" OR DE "GAELIC games" OR DE "GAY Games" OR DE "GOODWILL Games" OR DE "GYMNASTICS" OR DE "HOCKEY" OR DE "HOMOPHOBIA in sports" OR DE "HYDRODYNAMICS in sports" OR DE "INDIVIDUAL sports" OR DE "KINEMATICS in sports" OR DE "KNIFE throwing" OR DE "LGBT people & sports" OR DE "LOG-chopping Sports" OR DE "MASCULINITY in sports" OR DE "MASS media & sports" OR DE "MILITARY sports" OR DE "MINORITIES in sports" OR DE "MOTION pictures in sports" OR DE "MOTORSPORTS" OR DE "NATIONAL socialism & sports" OR DE "NATIONALISM & sports" OR DE "NONVERBAL communication in sports" OR DE "OLYMPIC Games" OR DE "PARKOUR" OR DE "PHOTOGRAPHY of sports" OR DE "PHYSICS in sports" OR DE "PRESIDENTS -- Sports" OR DE "PROFESSIONAL sports" OR DE "PROFESSIONALISM in sports" OR DE "RACING" OR DE "RACISM in sports" OR DE "RACKET games" OR DE "RADAR in sports" OR DE "RECREATIONAL sports" OR DE "REGIONALISM & sports" OR DE "ROBOTICS in sports" OR DE "RODEOS" OR DE "ROLLER skating" OR DE "SCHOOL sports" OR DE "SENIOR Olympics" OR DE "SEXUAL harassment in sports" OR DE "SHOOTING Sports" OR DE "SHUTOUTS Sports" OR DE "SOCIALISM & sports" OR DE "SOFTBALL" OR DE "SPORT for all" OR DE "SPORTS & state" OR DE "SPORTS & technology" OR DE "SPORTS & theater" OR DE "SPORTS & tourism" OR DE "SPORTS -- Collectibles" OR DE "SPORTS -- Corrupt practices" OR DE "SPORTS -- Economic aspects" OR DE "SPORTS -- Finance" OR DE "SPORTS -- Folklore" OR DE "SPORTS -- Songs & music" OR DE "SPORTS competitions" OR DE "SPORTS for children" OR DE "SPORTS for girls" OR DE "SPORTS for older people" OR DE "SPORTS for people with disabilities" OR DE "SPORTS for women" OR DE "SPORTS for youth" OR DE "SPORTS forecasting" OR DE "SPORTS in antiquity" OR DE "SPORTS penalties" OR DE "SPORTS rivalries" OR DE "SPORTS teams" OR DE "SPORTS tourism" OR DE "STEREOTYPES Social psychology in sports" OR DE "TARGETS Sports" OR DE "TEAM sports" OR DE "TEAMWORK Sports" OR DE "TELEVISION & sports" OR DE "TRACEURS" OR DE "VIDEO tapes in sports" OR DE "VIOLENCE in sports" OR DE "WINTER sports") OR (DE "LOCOMOTION" OR DE "CYCLING" OR DE "HUMAN locomotion") | **503,410** |
| S13 | DE "SEDENTARY lifestyles" OR DE "SEDENTARY behavior" OR DE "SEDENTARY people" OR DE "SEDENTARY women" OR TI (sedent* OR sitting OR "physical inactivit*") OR AB (sedent* OR sitting OR "physical inactivit*") | **18,283** |
| S12 | S3 OR S5 OR S11 | **902** |
| S11 | S1 AND S10 | **101** |
| S10 | S8 OR S9 | **3,691** |
| S9 | DE "HEART rate monitoring" | **2,229** |
| S8 | S6 AND S7 | **1,724** |
| S7 | DE "Patient Monitoring" OR TI monitoring OR AB monitoring | **15,144** |
| S6 | DE "PULSE (Heart beat)" OR DE "HEART beat" OR TI ("cardiac rate" or "heart rate" or "pulse rate" or "cardiac frequency" or "heart frequency") OR AB ("cardiac rate" or "heart rate" or "pulse rate" or "cardiac frequency" or "heart frequency") | **30,490** |
| S5 | S1 AND S4 | **214** |
| S4 | DE "PEDOMETERS" OR TI pedomet* OR AB pedomet* | **1,882** |
| S3 | S1 AND S2 | **652** |
| S2 | ( DE "ACCELEROMETERS" OR DE "SPEEDOMETERS" ) OR ( TI ( (acceleromet* OR actigra*) ) OR AB ( (acceleromet* OR actigra*) ) ) | **6,650** |
| S1 | ( (DE "OLDER people" OR DE "EXERCISE for older people" OR DE "OLDER people -- Recreation" OR DE "PHYSICAL education for older people" OR DE "PHYSICAL fitness for older people" OR DE "SPORTS for older people") OR DE "GERIATRICS" ) OR ( TI (elder* OR eldest OR frail* OR geriatri* OR “old age*” OR “oldest old*” OR senior* OR senium OR “very old*” OR septuagenarian* OR octagenarian* OR octogenarian* OR nonagenarian* OR centarian* OR centenarian* OR supercentenarian* OR “older people” OR “older subject*” OR “older patient*” OR “older age*” OR “older adult*” OR “older man” OR “older men” OR “older male” OR “older woman” OR “older women” OR “older female” OR “older population*” OR “older person*”) OR AB (elder* OR eldest OR frail* OR geriatri* OR “old age*” OR “oldest old*” OR senior* OR senium OR “very old*” OR septuagenarian* OR octagenarian* OR octogenarian* OR nonagenarian* OR centarian* OR centenarian* OR supercentenarian* OR “older people” OR “older subject*” OR “older patient*” OR “older age*” OR “older adult*” OR “older man” OR “older men” OR “older male” OR “older woman” OR “older women” OR “older female” OR “older population*” OR “older person*”) ) | **57,686** |

**Appendix B. Modified version of the Newcastle-Ottawa Scale**

**Newcastle-Ottawa Scale (NOS)**

The NOS was customized for cross-sectional and longitudinal studies in this systematic review using the same questions in each domain (selection, comparability, and outcome), with two additional outcome criteria for studies with a longitudinal study design. For cross-sectional studies (maximum of 7 stars), a score greater than or equal to four identified high-quality studies, whereas a score lower than four denoted low-quality studies. For longitudinal studies (maximum of 9 stars) a score greater than or equal to five identified studies of high quality, whereas a score lower than five denoted studies of low quality. (★ = 1 star).

*Note: study quality was also assessed for articles that studied activities of daily living or instrumental activities of daily living (independent variable) in relation to physical activity (PA) and sedentary behavior (SB) (dependent variable).*

**Selection** (maximum of 3 stars)

1. Representativeness of study population
   1. Truly representative sample as age, sex distribution, countries, and kind of community-dwelling older adult population are reported ★
   2. Not representative based on aforementioned factors or no description
2. Ascertainment of exposure: physical activity (PA) or sedentary behavior (SB)
   1. Clearly described by name of device, wear location, and distinction between any physical activity level is reported by cut-off values (if applicable) ★
   2. Methodological criteria of PA/SB are clearly described based on the following information: total wear time and assessment of valid days (including required hours per day and number of valid days) ★
   3. No description

**Comparability** (maximum of 3 stars)

1. Comparability of cohorts based on study design and statistical analysis
   1. The study controls for the most important factors for at least one association: age and sex ★
   2. The study controls for any other factors such as comorbidities, body mass index, cognition, levels of physical activity ★
   3. No adjustment or not described
2. Statistical analysis: test to quantify the association of interest
   1. The performed statistical analysis was clearly described and all of the following information is reported: effect size with 95% confidence interval, p-value, or standard deviation ★
   2. Statistical test was incomplete or no description

**Outcome** (for cross-sectional studies, a maximum of 1 star; for longitudinal studies, a maximum of 3 stars)

1. Assessment of outcome: activities of daily living or instrumental activities of daily living
   1. Clear description of validated method, survey, or custom questionnaire that was used to assess activities of daily living or instrumental activities of daily living ★
   2. No description
2. *(Only for longitudinal studies)* Was follow-up long enough to occur?
   1. Yes, ≥3 months ★
   2. No, <3 months
3. *(Only for longitudinal studies)* Adequacy of follow-up
   1. Complete follow-up with all participants accounted for or only a small number lost (<20%) ★
   2. Large number of participants lost (≥20%)
   3. No description
